# Supplementary material for: A hydrophobic polymer stabilized CsPbBr3 sensor for environmental pollutant detection
Source: Royal Society of Chemistry journal article supplement (doi:10.1039/d0nj04498a), 2020-12-09
Supplement: d0nj04498a1.pdf [file d0nj04498a1.pdf]

Supplementary Information

**A Hydrophobic Polymer Stabilized CsPbBr<sub>3</sub> Sensor for Environmental Pollutant Detection**

Pengyin Deng<sup>a,b</sup>, Wei Wang<sup>c</sup>, Xiqing Liu<sup>d</sup>, Liang Wang<sup>a,b,\*</sup>, Yongsheng Yan<sup>e,\*</sup>

<sup>a</sup>Key laboratory of Preparation and Application of Environmental Friendly Materials, Jilin Normal University, Ministry of Education, Changchun 130103, P. R. China.

<sup>b</sup>College of Chemistry, Jilin Normal University, Siping 136000, P. R. China.

<sup>c</sup>School of Chemistry and Environmental Engineering, Changchun University of Science and Technology, 130022 Changchun, P. R. China.

<sup>d</sup>School of Material Science and Engineering, Jiangsu University, 212013 Zhenjiang, P. R. China.

<sup>e</sup>Institute of Green Chemistry and Chemical Technology, Jiangsu University, 212013 Zhenjiang, P. R. China.

\*Corresponding author.

E-mail: 345193040@qq.com

Tel: +86 158-4340-0699

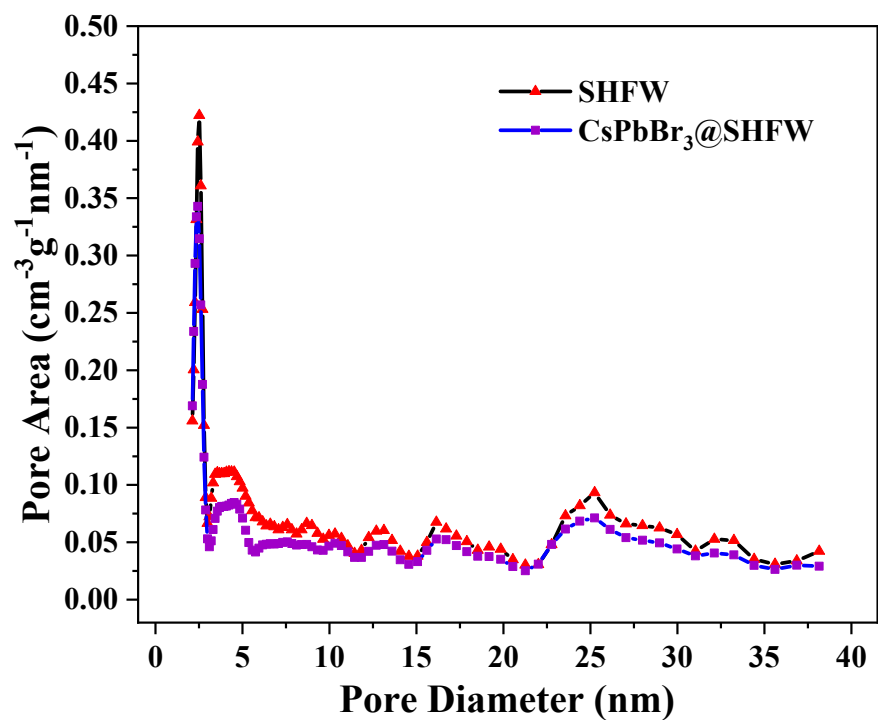

**Figure S1.** The corresponding pore diameter distribution plots of SHFW and CsPbBr<sub>3</sub>@SHFW.

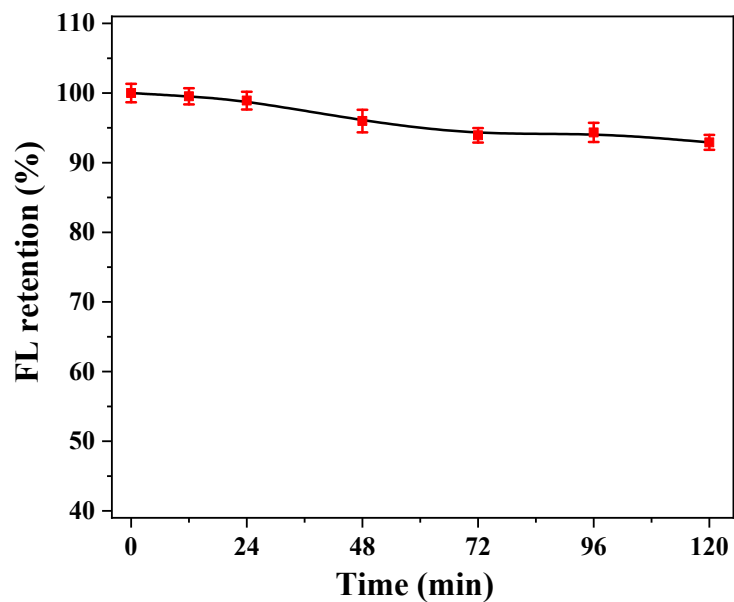

**Figure S2.** The fluorescence stability of CsPbBr<sub>3</sub>@SHFW within 120 min.

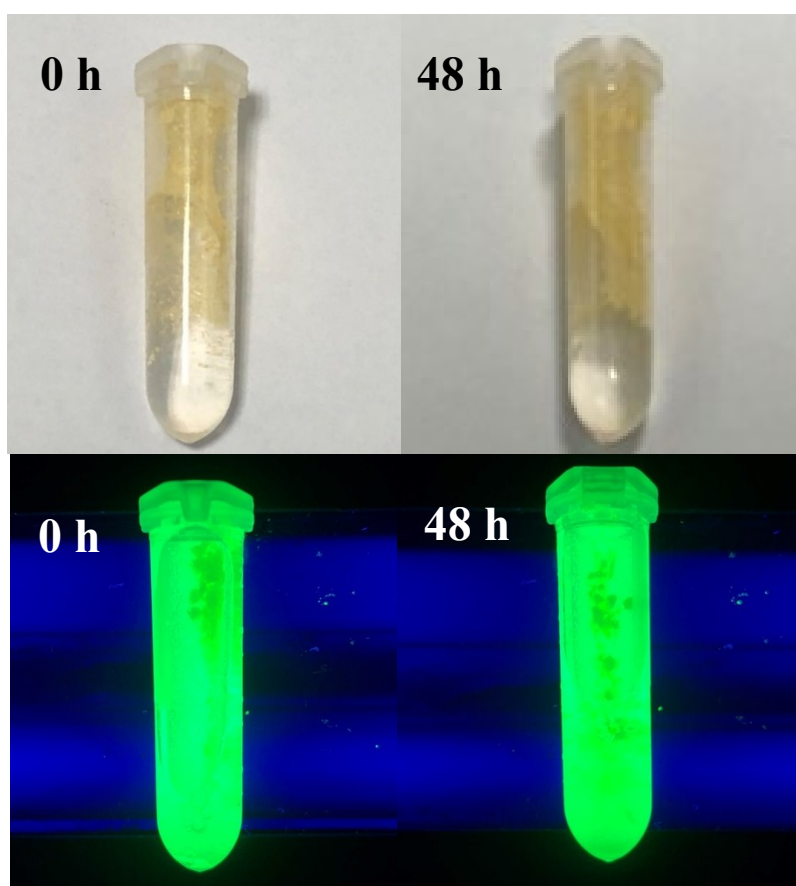

**Figure S3.** Photographs of CsPbBr<sub>3</sub>@SHFW immersed in water under white light and 365 nm UV light, respectively

**Table S1.** BET surface area and pore volume of the SHFW and CsPbBr<sub>3</sub>@SHFW.

|                           | BET specific surface<br>area (m <sup>2</sup> /g) | Pore volume<br>(cm <sup>3</sup> /g) | Pore size distribution<br>(nm) |
|---------------------------|--------------------------------------------------|-------------------------------------|--------------------------------|
| SHFW                      | 724.450                                          | 1.150                               | 2-38                           |
| CsPbBr <sub>3</sub> @SHFW | 500.959                                          | 0.895                               | 2-38                           |
